# Supplementary material for: Pseudodiaptomus marinus Sato, 1913 in the Black Sea: morphology, genetic analysis, and variability in seasonal and interannual abundance
Source: PeerJ. 2020 Oct 22;8:e10153. doi: 10.7717/peerj.10153 (PMC7585723; doi:10.7717/peerj.10153)
Supplement: Supplemental Information 2 — The file includes columns with the following information: (1) Year; (2) Month; (3) Day of sampling; (4) station number ; (5) - (6) depth of sampling - from and up to correspondingly; (7) volume of filtered water; (8) stage of development, where: f- female, m –male, C1-5 - copepodite development stages, n - nauplii, nf - not found; (9) ind/sample - abundunce P. marinus in the sample; (10) ind/m3 - abundunce P. marinus in m3; (11) T ° - sea surface temperature. [file peerj-08-10153-s002.xls]

## Sheet: Лист1
Year	Month	Day	station	from, m	up to , m	V , m3	stage	ind/sample	ind/m3	T °С sea surface
2016	9	22	2	0	10	1	n	2	2	22.3
2016	9	22	3	0	9	0.9	f	6	6.66667	22.5
2016	9	22	3	0	9	0.9	c4-c5	5	5.55556	22.5
2016	9	22	3	0	9	0.9	c1-c3	7	7.77778	22.5
2016	9	22	3	0	9	0.9	n	2	2.22222	22.5
2016	11	9	2	0	10	1	f	1	1	14.2
2016	11	9	2	0	10	1	c4-c5	59	59	14.2
2016	11	9	2	0	10	1	c1-c3	43	43	14.2
2016	11	9	2	0	10	1	n	26	26	14.2
2016	11	9	3	0	9	0.9	f	2	2.22222	14.3
2016	11	9	3	0	9	0.9	c4-c5	817	907.778	14.3
2016	11	9	3	0	9	0.9	c1-c3	417	463.333	14.3
2016	11	9	3	0	9	0.9	n	11	12.2222	14.3
2016	11	25	2	0	10	1	nf	nf	nf	11.2
2016	11	25	3	0	9	0.9	nf	nf	nf	11
2016	12	23	2	0	10	1	nf	nf	nf	6.1
2016	12	23	3	0	10	1	f	1	1	6.2
2017	3	3	1	0	40	4	nf	nf	nf	8.1
2017	3	3	2	0	10	1	nf	nf	nf	7.6
2017	3	3	3	0	9	0.9	nf	nf	nf	7.8
2017	3	15	2	0	10	1	nf	nf	nf	9.1
2017	3	15	3	0	9	0.9	nf	nf	nf	9.5
2017	4	3	1	0	40	4	nf	nf	nf	10.1
2017	4	3	2	0	10	1	nf	nf	nf	10.6
2017	4	3	3	0	9	0.9	nf	nf	nf	11.2
2017	4	26	2	0	10	1	nf	nf	nf	11.1
2017	4	26	3	0	9	0.9	nf	nf	nf	11.2
2017	5	30	2	0	10	1	nf	nf	nf	18.7
2017	5	30	3	0	9	0.9	nf	nf	nf	18
2017	6	16	2	0	10	1	nf	nf	nf	21.2
2017	6	16	3	0	9	0.9	c1	1	1.11111	22.2
2017	6	29	2	0	10	1	nf	nf	nf	24.2
2017	6	29	3	0	9	0.9	nf	nf	nf	25.4
2017	7	17	2	0	10	1	nf	nf	nf	23.2
2017	7	17	3	0	9	0.9	nf	nf	nf	24.8
2017	8	28	2	0	10	1	nf	nf	nf	25.2
2017	8	28	3	0	9	0.9	nf	nf	nf	25.3
2017	9	21	2	0	10	1	nf	nf	nf	24
2017	9	21	3	0	9	0.9	c1-c3	5	5.55556	24.2
2017	9	21	3	0	9	0.9	naupl.	2	2.22222	24.2
2017	10	19	2	0	10	1	nf	nf	nf	17.3
2017	10	19	3	0	9	0.9	c1-c3	66	73.3333	17.4
2017	10	19	3	0	9	0.9	naupl.	31	34.4444	17.4
2017	11	9	2	0	10	1	c1-c3	3	3	13.6
2017	11	9	2	0	10	1	naupl.	13	13	13.6
2017	11	9	3	0	9	0.9	c1-c3	11	12.2222	13.9
2017	11	9	3	0	9	0.9	naupl.	254	282.222	13.9
2017	11	16	2	0	10	1	c1	3	3	13.4
2017	11	16	2	0	10	1	naupl.	9	9	13.4
2017	11	16	3	0	9	0.9	c1	16	17.7778	13.8
2017	11	16	3	0	9	0.9	naupl.	56	62.2222	13.8
2017	11	23	2	0	10	1	nf	nf	nf	10.7
2017	11	23	3	0	9	0.9	c1-c3	41	45.5556	10.6
2017	11	23	3	0	9	0.9	naupl.	22	24.4444	10.6
2017	11	30	2	0	10	1	nf	nf	nf	12.2
2017	11	30	3	0	9	0.9	с1-с2	17	18.8889	12.4
2017	11	30	3	0	9	0.9	naupl.	32	35.5556	12.4
2017	12	14	2	0	10	1	naupl.	2	2	10.5
2017	12	14	3	0	9	0.9	с1-с3	8	8.88889	10.6
2017	12	14	3	0	9	0.9	naupl.	12	13.3333	10.6
2017	12	28	2	0	11	1.1	nf	nf	nf	9.7
2017	12	28	3	0	11	1.1	nf	nf	nf	9.9
2018	2	2	2	0	10	1	nf	nf	nf	8.3
2018	2	2	3	0	10	1	nf	nf	nf	7.3
2018	2	15	2	0	10	1	nf	nf	nf	8.3
2018	2	15	3	0	9	0.9	nf	nf	nf	7.7
2018	3	7	2	0	10	1	nf	nf	nf	7
2018	3	7	3	0	10	1	nf	nf	nf	7.8
2018	4	4	2	0	10	1	nf	nf	nf	9.9
2018	4	4	3	0	10	1	nf	nf	nf	10.45
2018	6	7	2	0	10	1	nf	nf	nf	21.5
2018	6	7	3	0	9	0.9	c4-c5	1	1.11111	22.7
2018	6	7	3	0	9	0.9	naupl.	21	23.3333	22.7
2018	6	21	2	0	10	1	nf	nf	nf	24.1
2018	6	21	3	0	9	0.9	nf	nf	nf	24.8
2018	7	5	2	0	10	1	nf	nf	nf	25
2018	7	5	3	0	9	0.9	nf	nf	nf	26.4
2018	7	19	1	0	40	4	nf	nf	nf	24.3
2018	7	19	2	0	10	1	naupl.	3	3	25
2018	7	19	3	0	10	1	c1-c3	1	1	26
2018	7	19	3	0	10	1	naupl.	2	2	26
2018	8	3	1	0	40	4	nf	nf	nf	25.7
2018	8	3	2	0	10	1	naupl.	3	3	25.4
2018	8	3	3	0	9	0.9	c1-c3	1	1.11111	25.6
2018	8	3	3	0	9	0.9	naupl.	1	1.11111	25.6
2018	8	24	1	0	40	4	nf	nf	nf	25.6
2018	8	24	2	0	10	1	c1-c3	5	5	26
2018	8	24	2	0	10	1	naupl.	5	5	26
2018	8	24	3	0	9	0.9	c4-c5	1	1.11111	26.2
2018	8	24	3	0	9	0.9	c1-c3	30	33.3333	26.2
2018	8	24	3	0	9	0.9	naupl.	100	111.111	26.2
2018	10	8	1	0	40	4	nf	nf	nf	18.4
2018	10	8	2	0	10	1	f	54	54	18.9
2018	10	8	2	0	10	1	m	11	11	18.9
2018	10	8	2	0	10	1	c4-c5	886	886	18.9
2018	10	8	2	0	10	1	c1-c3	1271	1271	18.9
2018	10	8	2	0	10	1	naupl.	214	214	18.9
2018	10	8	3	0	9	0.9	f	6	6.66667	18.9
2018	10	8	3	0	9	0.9	m	2	2.22222	18.9
2018	10	8	3	0	9	0.9	c4-c5	700	777.778	18.9
2018	10	8	3	0	9	0.9	c1-c3	3957	4396.67	18.9
2018	10	8	3	0	9	0.9	naupl.	1157	1285.56	18.9
2018	10	18	1	0	40	4	nf	nf	nf	17.8
2018	10	18	2	0	10	1	f	11	11	17.8
2018	10	18	2	0	10	1	m	5	5	17.8
2018	10	18	2	0	10	1	c4-c5	66	66	17.8
2018	10	18	2	0	10	1	c1-c3	95	95	17.8
2018	10	18	2	0	10	1	naupl.	100	100	17.8
2018	10	18	3	0	9	0.9	f	12	13.3333	17.8
2018	10	18	3	0	9	0.9	m	7	7.77778	17.8
2018	10	18	3	0	9	0.9	c4-c5	257	285.556	17.8
2018	10	18	3	0	9	0.9	c1-c3	529	587.778	17.8
2018	10	18	3	0	9	0.9	naupl.	229	254.444	17.8
2018	11	9	2	0	10	1	c4-c5	1	1	15.4
2018	11	9	2	0	10	1	c1-c3	7	7	16
2018	11	9	2	0	10	1	naupl.	8	8	16
2018	11	9	3	0	9	0.9	c1-c3	19	21.1111	16.2
2018	11	9	3	0	9	0.9	naupl.	10	11.1111	16.2
2018	12	4	1	0	40	4	nf	nf	nf	11.2
2018	12	4	2	0	10	1	c4-c5	3	3	10.3
2018	12	4	2	0	10	1	c1-c3	36	36	10.3
2018	12	4	2	0	10	1	naupl.	6	6	10.3
2018	12	4	3	0	9	0.9	c4-c5	12	13.3333	10
2018	12	4	3	0	9	0.9	c1-c3	166	184.444	10
station1	44° 38,398 N; 33° 27,293 E
station2	44° 37,477 N; 33°30,775 E
station3	44° 37 052 E; 33° 34 438 N
f	female
m	male
c1-c3	copepodite stages
c4-c5	copepodite stages
naupl	nauplii
nf	not found
V	volume of filtered water
